# Supplementary material
Source: PubMed Central journal article supplement (PMC3063583)
Supplement: 1011383107_pnas.201011383SI.pdf [file 1011383107_pnas.201011383SI.pdf]

# Supporting Information

Koren et al. 10.1073/pnas.1011383107

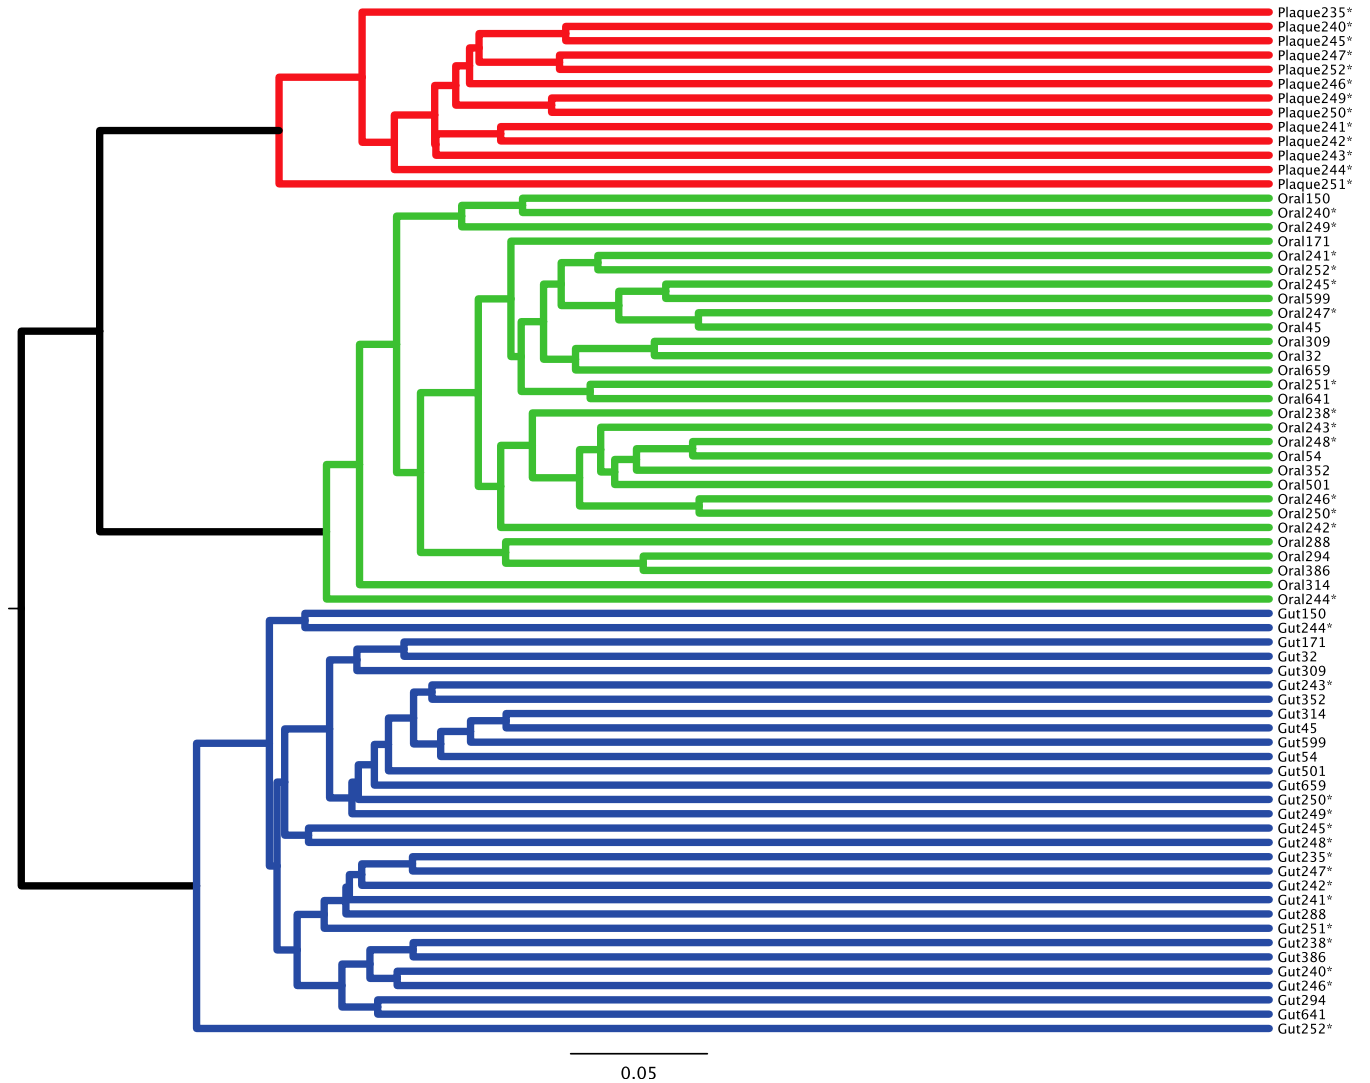

**Fig. S1.** Clustering of bacterial communities from atherosclerotic plaques, oral cavity, and gut samples. UPGMA clustering of samples using the unweighted UniFrac distances between samples. Branches are colored by body site, and numbers in labels refer to subject numbers in the study. All atherosclerotic plaque samples are from patients; oral and gut samples from patients are noted with an asterisk.

**Table S1. Number of sequences per sample**

| Subject ID | Feces | Mouth | Plaque |
|------------|-------|-------|--------|
| 235        | 3,813 | ND    | 26,100 |
| 238        | 3,418 | 4,191 | 1,037  |
| 240        | 3,471 | 5,632 | 5,583  |
| 241        | 3,142 | 4,871 | 3,914  |
| 242        | 4,140 | 4,298 | 4,074  |
| 243        | 3,212 | 3,587 | 7,357  |
| 244        | 3,837 | 5,540 | 29,070 |
| 245        | 3,604 | 4,947 | 12,845 |
| 246        | 3,393 | 4,835 | 5,462  |
| 247        | 2,874 | 4,486 | 6,501  |
| 248        | 3,708 | 4,954 | ND     |
| 249        | 3,758 | 5,862 | 5,909  |
| 250        | 3,501 | 7255  | 5,292  |
| 251        | 3,999 | 4419  | 46,279 |
| 252        | 4,735 | 4,890 | 1,796  |
| 150        | 3,432 | 3,851 |        |
| 171        | 2,576 | 3,936 |        |
| 288        | 2,462 | 3,586 |        |
| 294        | 3,327 | 3,916 |        |
| 309        | 2,751 | 3,473 |        |
| 314        | 2,795 | 3,456 |        |
| 32         | 2,894 | 3,215 |        |
| 352        | 2,789 | 3,193 |        |
| 386        | 3,291 | 3,312 |        |
| 45         | 2,946 | 3,648 |        |
| 501        | 2,051 | 2,522 |        |
| 54         | 2,921 | 2,508 |        |
| 599        | 2,338 | 3,758 |        |
| 641        | 3,400 | 3,504 |        |
| 659        | 3,448 | 3,611 |        |

**Table S2. Presence of *Chlamydia* DNA in atherosclerotic plaques**

| Patient | <i>Chlamydia</i> DNA, pg/ $\mu$ L |
|---------|-----------------------------------|
| 235     | 1.25                              |
| 238     | 3.67                              |
| 240     | 1.07                              |
| 241     | 1.48                              |
| 242     | 0.96                              |
| 243     | 0.6                               |
| 244     | 2.16                              |
| 245     | 1.11                              |
| 246     | 0.787                             |
| 247     | 1.19                              |
| 249     | 0.92                              |
| 250     | 1.34                              |
| 251     | 0.937                             |
| 252     | 0.84                              |
